# Supplementary material
Source: publisher figshare collection journal article supplement (https://wiley.figshare.com/articles/dataset/_/3568590)
Supplement: Supplementary file 1 [file 1]

## APPENDIX D. EXAMPLES OF OTHER FORMATION-LEVEL CLASSIFICATIONS

---

*Main World Terrestrial Biome Types (Box and Fujiwara 2005, Table 4.4,)*

The authors provide 18 major biome types recognized by most modern treatments of world vegetation. For example, they recognize the following forest biomes:

|                                                                                  |
|----------------------------------------------------------------------------------|
| Tropical rain forest (including montane and cloud forests)                       |
| Tropical deciduous forest, woodland, and thorn scrub                             |
| Temperate forests                                                                |
| Deciduous broad-leaved forest                                                    |
| Evergreen broad-leaved forest (incl. laurel forest, warm-temperate mixed forest) |
| Temperate rain forest                                                            |
| Conifer forests                                                                  |
| Boreal (including deciduous)                                                     |
| Montane conifer forest (temperate montane and subalpine)                         |

---

From. Box, E. O., and K. Fujiwara. 2005. Vegetation types and their broad-scale distribution. Pp. 106–128 in van der Maarel, E. Vegetation ecology. Blackwell Publishing. Malden, Massachussets, USA.

*World Wildlife Fund Major Habitat Types (Olson 2001)*

| <b>MAJOR HABITAT TYPES</b>                                               |
|--------------------------------------------------------------------------|
| <b>Tropical &amp; Subtropical Moist Broadleaf Forests</b>                |
| <b>Tropical &amp; Subtropical Dry Broadleaf Forests</b>                  |
| <b>Tropical &amp; Subtropical Coniferous Forests</b>                     |
| <b>Temperate Broadleaf &amp; Mixed Forests</b>                           |
| <b>Temperate Coniferous Forests</b>                                      |
| <b>Boreal Forests/Taiga</b>                                              |
| <b>Tropical &amp; Subtropical Grasslands, Savannas, &amp; Shrublands</b> |
| <b>Temperate Grasslands, Savannas, &amp; Shrublands</b>                  |
| <b>Flooded Grassland and Savannas [temperate and tropical]</b>           |
| <b>Montane Grassland and Savannas [temperate and tropical]</b>           |
| <b>Polar</b>                                                             |
| <b>Mediterranean Forests, Woodlands, &amp; Shrub</b>                     |
| <b>Deserts &amp; Xeric Shrublands</b>                                    |
| <b>Mangroves</b>                                                         |
| <b>Lake</b>                                                              |
| <b>Rock and Ice</b>                                                      |

David M. Olson, Eric Dinerstein, Eric D. Wikramanayake, et al. 2001. Terrestrial ecoregions of the world: a new map of life on earth. *BioScience* 51(11):933–938.

*Formations (Biomes) - (Whittaker 1975)*

| <b>FORMATIONS (BIOMES)</b>              |                                                         |
|-----------------------------------------|---------------------------------------------------------|
| <b>FORESTS AND WOODLANDS</b>            |                                                         |
| 1.                                      | Tropical rain forest                                    |
| 2.                                      | Tropical seasonal forest                                |
| 3.                                      | Temperate rain forest                                   |
| 4.                                      | Temperate deciduous forest                              |
| 5a.                                     | Temperate evergreen forest --broadleaf                  |
| 5b.                                     | Temp. evergreen forest--needleleaf                      |
| 5c.                                     | Temperate evergreen forest--sclerophyll [Mediterranean] |
| 6                                       | Taiga & subarctic-subalpine needle-leaved forest        |
| 7.                                      | Elfin woodland                                          |
| 8.                                      | Tropical broadleaf woodland                             |
| 9a.                                     | Thornwood--woodland                                     |
| 9b.                                     | Thornwood--scrub                                        |
| 10a.                                    | Temperate woodland --needleleaf                         |
| 10b.                                    | Temperate woodland--sclerophyll                         |
| 10c.                                    | Temperate woodland--deciduous broadleaf                 |
| <b>SHRUBLANDS</b>                       |                                                         |
| 11a.                                    | Temperate shrubland--deciduous                          |
| 11b.                                    | Temperate shrubland--heath                              |
| 11c.                                    | Temperate shrubland--sclerophyll [Mediterranean]        |
| 11d.                                    | Temperate shrubland--subalpine, needleleaf              |
| 11e.                                    | Temperate shrubland--subalpine, broadleaf               |
| <b>GRASSLANDS AND ALPINE VEGETATION</b> |                                                         |
| 12.                                     | Savanna [tropical grassland]                            |
| 13.                                     | Temperate grassland                                     |
| 14.                                     | Alpine shrubland                                        |
| 15.                                     | Alpine grassland                                        |
| <b>COLD AND WARM DESERTS and TUNDRA</b> |                                                         |
| 16.                                     | Tundra                                                  |
| 17.                                     | Warm semidesert scrub                                   |
| 18a.                                    | Cool semidesert--open scrub                             |
| 18b.                                    | Cool semidesert--dry grassland                          |
| 19.                                     | Arctic-alpine semidesert                                |

|                                       |
|---------------------------------------|
| 20. True desert                       |
| 21. Arctic-alpine desert              |
|                                       |
| <b>SWAMPS, MARSHES AND BOGS</b>       |
| 22. Cool temperate bog                |
| 23. Tropical freshwater swamp forest  |
| 24. Temperate freshwater swamp forest |
| 25. Mangrove swamp                    |
| 25. Saltmarsh                         |
|                                       |
| <b>MARINE AND AQUATIC</b>             |
| [26-29 are aquatic]                   |
| 29. Marine rocky shores               |
| 30. Marine sandy beaches              |
| 31. Marine mudflats                   |

Whittaker, R. H. 1975. Communities and ecosystems. Second edition. MacMillan, New York. (pp. 135–161).

*Formations of Australia (Specht and Specht 2001)*

| <b>FORMATIONS<sup>1,2</sup></b>                                         |
|-------------------------------------------------------------------------|
| Closed forests (rainforests) - tropical north-eastern Australia         |
| Closed forests (rainforests) - subtropical eastern Australia            |
| Closed forests (rainforests) - temperate south-eastern Australia        |
| Semi-deciduous closed forests - monsoonal northern Australia            |
| Semi-deciduous closed forests - subtropical eastern Australia           |
| Eucalypt open forests and woodlands - monsoonal northern Australia      |
| Eucalypt open forests and woodlands - subtropical eastern Australia     |
| Eucalypt open forests and woodlands - temperate south-eastern Australia |
| Eucalypt open forests and woodlands - montane south-eastern Australia   |
| Eucalypt open forests and woodlands - temperate south-western Australia |
| Eucalypt open forests and woodlands - Australia wetland forests         |
| Mallee eucalypt open-scrubs - monsoonal northern Australia              |
| Mallee eucalypt open-scrubs - subtropical eastern Australia             |
| Mallee eucalypt open-scrubs - temperate south-eastern Australia         |
| Mallee eucalypt open-scrubs - temperate south-western Australia         |
| Heathlands and related shrublands - monsoonal northern Australia        |
| Heathlands and related shrublands - subtropical eastern Australia       |
| Heathlands and related shrublands - temperate south-eastern Australia   |
| Heathlands and related shrublands - montane south-eastern Australia     |
| Heathlands and related shrublands - temperate south-western Australia   |
| Tussock grasslands                                                      |
| Acacia vegetation - subhumid, subtropical eastern Australia             |
| Acacia vegetation - Australian Arid Zone                                |
| Hummock grasslands - Australian Arid Zone                               |
| Chenopod low shrublands - southern Australia Arid Zone                  |

|                                                                             |
|-----------------------------------------------------------------------------|
|                                                                             |
| Aquatic vegetation - tropical and subtropical northern Australia            |
| Aquatic vegetation - temperate southern Australia                           |
|                                                                             |
| Coastal dune vegetation                                                     |
| Coastal wetland vegetation (mangroves, salt marshes, and brackish wetlands) |
|                                                                             |

1. Specht, R. L., and A. Specht. 2001. Australia, ecosystems of. Pp. 307–324, *in* S. A. Levin, editor. Encyclopedia of Biodiversity, Vol. 1. Academic Press, New York, New York, USA.
2. Within each formation, Specht and Specht (2001) also provide a set of Floristic Groups.

*Australian Native Vegetation (NWLRA 2001)*

Vegetation profile fact sheets were developed for each type listed below:

| MAJOR VEGETATION GROUP                                                                               |
|------------------------------------------------------------------------------------------------------|
| Rain forest and vine thickets                                                                        |
| Eucalypt and tall open forests                                                                       |
| Eucalypt open forests                                                                                |
| Eucalypt low open forests                                                                            |
| Eucalypt woodlands                                                                                   |
| <i>Acacia</i> forests and woodlands                                                                  |
| <i>Callitris</i> forests and woodlands                                                               |
| <i>Casuarina</i> forests and woodlands                                                               |
| <i>Melaleuca</i> forests and woodlands                                                               |
| Other forests and woodlands                                                                          |
| Eucalypt open woodlands                                                                              |
| Tropical Eucalypt woodlands/grasslands                                                               |
| <i>Acacia</i> open woodlands                                                                         |
| Mallee woodlands and shrublands                                                                      |
| Low closed forests and closed shrublands                                                             |
| <i>Acacia</i> shrublands                                                                             |
| Other shrublands                                                                                     |
| Heath                                                                                                |
| Tussock grasslands                                                                                   |
| Hummock grasslands                                                                                   |
| Other grasslands, herblands, sedgelands and rushlands                                                |
| Chenopod shrublands, samphire shrubs and forblands                                                   |
| Mangroves, tidal mudflats, samphires, claypans, sand, rock, salt lakes, lagoons and freshwater lakes |

NWLRA (National Land and Water Resources Audit). 2001. Australian Native Vegetation Assessment 2001. National Land And Water Resources Audit. Canberra, Australia.

*EUROPEAN VEGETATION SURVEY (2002)*

**FORMATIONS**

|                                                                    |
|--------------------------------------------------------------------|
| A. Coastal mud-flats and brackish waters                           |
| B. Saltmarsh, sand-dune and sea-cliff vegetation                   |
| C. Rock crevice, scree and boulderfield vegetation                 |
| D. Freshwater aquatic vegetation                                   |
| E. Springs, shoreline, and swamp [marsh] vegetation                |
| F. Bogs and fens                                                   |
| G. Temperate grasslands, heaths, and fringe vegetation             |
| H. Dry grasslands and semi-deserts                                 |
| I. Oromediterranean grasslands and scrub                           |
| J. Montane tall-herb, grassland, fell-field and snowbed vegetation |
| K. Mediterranean garrigue, maquis, matorral, tomillar and phrygna  |
| L. Temperate broadleaved forests and scrub                         |
| M. Montane heaths and coniferous forests                           |
| N. Weed communities                                                |

Rodwell, J. S., J. H. J. Schamineé, L. Mucian, S. Pignatti, J. Dring, and D. Moss. 2002. The diversity of European vegetation. An overview of phytosociological alliances and their relationships to EUNIS habitats. Wageningen, NL. EC-LNV. Report EC-LNV nr. 2002/054. 168 p.
