# Supplementary material
Source: publisher figshare collection journal article supplement (https://wiley.figshare.com/articles/dataset/_/3568590)
Supplement: Supplementary file 2 [file 1 › appendix-D.htm]

Ecological Archives M084-020-A4


*Ecological Archives* M084-020-A4

Don Faber-Langendoen, Todd Keeler-Wolf, Del Meidinger, Dave Tart, Bruce Hoagland, Carmen Josse, Gonzalo Navarro, Serguei Ponomarenko, Jean-Pierre Saucier, Alan Weakley, Patrick Comer. 2014. EcoVeg: a new approach to vegetation description and classification. *Ecological Monographs* 84:533–561. http://dx.doi.org/10.1890/13-2334.1

Appendix D. Examples of other formation-level classifications.

> View / download PDF.

---

[Back to M084-020]
